# Supplementary material for: Evaluating genetic markers and neurobiochemical analytes for fluoxetine response using a panel of mouse inbred strains
Source: PubMed Central journal article supplement — Psychopharmacology (Berl). 2011 Nov 24;221(2):297–315. doi: 10.1007/s00213-011-2574-z (PMC3337404; doi:10.1007/s00213-011-2574-z), 2011-11-24
Supplement: 213_2011_2574_MOESM1_ESM.pdf [file 213_2011_2574_MOESM1_ESM.pdf]

**Online Resource 1.** Mean water intake for vehicle and fluoxetine treated mice.

| Strain       | Mean Water Intake Per Cage (mL)# | SEM | Mean Water Intake Per Cage (mL)* | SEM | Water Intake between Treatment Groups (mL) |
|--------------|----------------------------------|-----|----------------------------------|-----|--------------------------------------------|
| 129S1/SvlmJ  | 5.2                              | 0.2 | 3.7                              | 0.3 | 1.43                                       |
| A/J          | 5.3                              | 0.2 | 4.7                              | 0.2 | 0.63                                       |
| AKR/J        | 7.4                              | 0.2 | 5.4                              | 0.2 | 1.98                                       |
| BALB/cJ      | 5.7                              | 0.3 | 5.1                              | 0.3 | 0.61                                       |
| BTBR T+ tf/J | 7.1                              | 0.2 | 6.4                              | 0.2 | 0.71                                       |
| BUB/BnJ      | 7.3                              | 0.4 | 5.8                              | 0.2 | 1.53                                       |
| C3H/HeJ      | 5.0                              | 0.2 | 4.7                              | 0.2 | 0.27                                       |
| C57BL/6J     | 6.0                              | 0.2 | 4.5                              | 0.2 | 1.51                                       |
| C57BLKS/J    | 6.1                              | 0.2 | 4.7                              | 0.2 | 1.39                                       |
| C57BR/cdJ    | 8.9                              | 0.3 | 8.0                              | 0.3 | 0.92                                       |
| C58/J        | 5.7                              | 0.2 | 4.6                              | 0.2 | 1.08                                       |
| CBA/J        | 6.1                              | 0.2 | 4.9                              | 0.2 | 1.14                                       |
| DBA/2J       | 6.4                              | 0.2 | 6.0                              | 0.2 | 0.37                                       |
| FVB/NJ       | 5.4                              | 0.3 | 5.2                              | 0.2 | 0.25                                       |
| I/LnJ        | 6.4                              | 0.2 | 4.8                              | 0.2 | 1.57                                       |
| LG/J         | 8.9                              | 0.4 | 5.8                              | 0.2 | 3.10                                       |
| LP/J         | 3.7                              | 0.2 | 3.6                              | 0.2 | 0.14                                       |
| MA/MyJ       | 6.7                              | 0.2 | 5.0                              | 0.2 | 1.69                                       |
| MRL/MpJ      | 13.2                             | 0.4 | 8.2                              | 0.2 | 4.98                                       |
| NOD/LtJ      | 7.1                              | 0.2 | 5.1                              | 0.2 | 2.04                                       |
| NOR/LtJ      | 5.8                              | 0.1 | 6.6                              | 0.2 | 0.84                                       |
| NZB/BINJ     | 6.0                              | 0.2 | 4.9                              | 0.2 | 1.16                                       |
| NZW/LacJ     | 9.7                              | 0.2 | 11.2                             | 0.5 | 1.53                                       |
| P/J          | 5.2                              | 0.2 | 4.9                              | 0.2 | 0.25                                       |
| PL/J         | 5.7                              | 0.2 | 3.9                              | 0.2 | 1.82                                       |
| RIIS/J       | 4.2                              | 0.2 | 4.1                              | 0.2 | 0.12                                       |
| SJL/J        | 7.2                              | 0.3 | 5.4                              | 0.3 | 1.76                                       |
| SM/J         | 5.4                              | 0.2 | 5.9                              | 0.3 | 0.53                                       |
| SWR/J        | 6.9                              | 0.3 | 5.0                              | 0.1 | 1.92                                       |

SEM = standard error of the mean; # Denotes behavioral mean water intake for control mice (water); \* Denotes mean water intake for fluoxetine-treated mice

**Online Resource 2.** Behavioral responses in the open field and tail suspension tests between control and fluoxetine treatment groups

| Strain       | Total number of animals tested per strain | Number of animals excluded from the TST analysis | Mean TST Immobility Scores (secs)# | SEM  | Mean TST Immobility Scores (secs)* | SEM  | Mean OF Center Time (secs)# | SEM  | Mean OF Center Time (secs)* | SEM  | Mean Total Distance Traveled in the OF(cm)# | SEM   | Mean Total Distance Traveled in the OF (cm)* | SEM   |
|--------------|-------------------------------------------|--------------------------------------------------|------------------------------------|------|------------------------------------|------|-----------------------------|------|-----------------------------|------|---------------------------------------------|-------|----------------------------------------------|-------|
| 129S1/SvImJ  | 28                                        | 2                                                | 122.5                              | 11.9 | 115.3                              | 10.8 | 23.0                        | 17.7 | 2.3                         | 1.6  | 450.2                                       | 98.5  | 360.2                                        | 87.5  |
| A/J          | 30                                        | 3                                                | 106.9                              | 11.7 | 115.4                              | 5.4  | 1.2                         | 1.1  | 6.6                         | 5.9  | 257.5                                       | 59.2  | 293.4                                        | 76.4  |
| AKR/J        | 18                                        | 2                                                | 192.6                              | 10.3 | 171.2                              | 15.6 | 70.9                        | 10.8 | 71.0                        | 15.5 | 1905.1                                      | 173.3 | 1824.1                                       | 119.5 |
| BALB/cJ      | 39                                        | 4                                                | 107.2                              | 10.6 | 56.6                               | 7.9  | 46.9                        | 23.3 | 30.8                        | 10.5 | 968.8                                       | 268.5 | 1018.5                                       | 211.6 |
| BTBR T+ tf/J | 21                                        | 4                                                | 15.7                               | 8.8  | 7.3                                | 4.3  | 56.2                        | 11.1 | 48.3                        | 9.3  | 1909.7                                      | 192.6 | 2131.0                                       | 237.4 |
| BUB/BnJ      | 18                                        | 1                                                | 142.3                              | 10.2 | 97.3                               | 10.5 | 111.9                       | 14.0 | 147.8                       | 14.6 | 1607.0                                      | 145.3 | 2392.9                                       | 272.7 |
| C3H/HeJ      | 30                                        | 2                                                | 97.3                               | 8.8  | 112.3                              | 12.3 | 65.0                        | 6.8  | 63.7                        | 5.9  | 1104.1                                      | 60.7  | 1079.8                                       | 42.8  |
| C57BL/6J     | 21                                        | 5                                                | 175.7                              | 18.6 | 103.5                              | 11.7 | 77.2                        | 10.8 | 65.8                        | 9.0  | 1128.4                                      | 74.6  | 1174.7                                       | 105.6 |
| C57BLKS/J    | 24                                        | 3                                                | 101.3                              | 13.6 | 72.6                               | 14.8 | 38.8                        | 6.1  | 37.3                        | 6.7  | 775.1                                       | 77.8  | 1004.9                                       | 190.8 |
| C57BR/cdJ    | 27                                        | 5                                                | 97.5                               | 19.6 | 33.3                               | 10.4 | 193.0                       | 15.8 | 156.0                       | 15.2 | 2134.3                                      | 109.9 | 2712.5                                       | 206.6 |
| C58/J        | 18                                        | 0                                                | 80.9                               | 13.1 | 83.2                               | 7.2  | 124.3                       | 15.9 | 105.6                       | 16.0 | 1998.1                                      | 240.0 | 2972.8                                       | 583.8 |
| CBA/J        | 30                                        | 2                                                | 135.0                              | 8.8  | 44.9                               | 8.5  | 70.5                        | 11.5 | 56.4                        | 12.3 | 1051.1                                      | 106.4 | 1506.6                                       | 103.9 |
| CE/J         | 24                                        | 3                                                | 108.8                              | 16.5 | 76.9                               | 9.9  | 79.2                        | 12.0 | 89.5                        | 7.6  | 1546.2                                      | 118.3 | 1518.4                                       | 140.5 |
| DBA/2J       | 36                                        | 9                                                | 44.3                               | 10.0 | 19.1                               | 4.7  | 33.8                        | 5.8  | 15.6                        | 3.4  | 1085.5                                      | 84.4  | 1824.3                                       | 255.4 |
| FVB/NJ       | 18                                        | 2                                                | 53.3                               | 13.6 | 70.4                               | 11.5 | 136.0                       | 6.8  | 112.8                       | 7.3  | 2209.3                                      | 148.3 | 1869.8                                       | 107.3 |
| I/LnJ        | 24                                        | 8                                                | 79.2                               | 28.6 | 77.2                               | 18.4 | 60.8                        | 8.5  | 40.5                        | 12.2 | 2065.3                                      | 124.4 | 2040.5                                       | 284.6 |
| LG/J         | 21                                        | 3                                                | 27.2                               | 13.4 | 4.5                                | 1.4  | 85.9                        | 16.0 | 44.4                        | 22.0 | 1677.1                                      | 97.9  | 1271.0                                       | 63.3  |
| LP/J         | 28                                        | 9                                                | 196.7                              | 13.5 | 177.7                              | 19.5 | 56.1                        | 27.3 | 28.7                        | 8.2  | 1011.0                                      | 195.4 | 611.7                                        | 90.8  |
| MA/MyJ       | 18                                        | 0                                                | 79.1                               | 18.0 | 33.9                               | 10.5 | 131.6                       | 12.5 | 76.8                        | 15.0 | 2349.2                                      | 182.9 | 3511.8                                       | 395.2 |
| MRL/MpJ      | 21                                        | 4                                                | 16.0                               | 5.1  | 14.7                               | 5.4  | 107.9                       | 11.4 | 85.8                        | 18.3 | 1471.8                                      | 67.6  | 1395.7                                       | 137.1 |
| NOD/LtJ      | 24                                        | 3                                                | 165.4                              | 8.6  | 141.2                              | 7.4  | 164.5                       | 18.7 | 146.6                       | 12.5 | 2669.3                                      | 229.6 | 2555.1                                       | 173.0 |
| NOR/LtJ      | 24                                        | 7                                                | 105.0                              | 9.9  | 84.6                               | 18.9 | 145.1                       | 12.1 | 157.2                       | 15.0 | 2410.6                                      | 180.6 | 2282.1                                       | 94.6  |
| NZB/BINJ     | 24                                        | 6                                                | 161.3                              | 31.0 | 201.3                              | 8.5  | 33.5                        | 7.0  | 13.5                        | 4.1  | 1070.3                                      | 63.0  | 942.2                                        | 123.1 |
| NZW/LacJ     | 21                                        | 4                                                | 124.7                              | 19.7 | 161.9                              | 17.1 | 76.3                        | 7.6  | 80.6                        | 16.7 | 1078.5                                      | 54.6  | 1350.7                                       | 162.1 |
| P/J          | 23                                        | 3                                                | 130.3                              | 17.5 | 40.7                               | 10.1 | 114.7                       | 20.3 | 59.8                        | 13.1 | 1807.3                                      | 56.4  | 2445.8                                       | 300.5 |
| PL/J         | 24                                        | 2                                                | 170.0                              | 11.9 | 137.6                              | 11.0 | 71.3                        | 4.7  | 57.2                        | 4.5  | 1840.4                                      | 106.8 | 1770.2                                       | 113.8 |
| RIIS/J       | 21                                        | 0                                                | 18.6                               | 4.6  | 32.8                               | 11.0 | 69.2                        | 4.1  | 79.9                        | 6.6  | 2050.6                                      | 100.4 | 1825.0                                       | 84.8  |
| SJL/J        | 24                                        | 4                                                | 143.7                              | 13.1 | 145.7                              | 15.4 | 109.2                       | 37.2 | 27.0                        | 17.7 | 945.1                                       | 106.2 | 853.5                                        | 78.7  |
| SM/J         | 18                                        | 4                                                | 229.5                              | 6.4  | 137.2                              | 13.3 | 70.6                        | 5.9  | 38.4                        | 7.7  | 1999.5                                      | 71.8  | 3180.8                                       | 641.0 |
| SWR/J        | 24                                        | 0                                                | 50.3                               | 9.9  | 69.6                               | 12.4 | 91.3                        | 5.4  | 105.2                       | 11.0 | 1393.5                                      | 83.0  | 1499.3                                       | 67.6  |

TST = tail suspension test; OF = open field; SEM = standard error of the mean; # Denotes behavioral scores for control mice (water); \* Denotes behavioral scores for fluoxetine-treated mice

**Online Resource 3. Serum Levels of Fluoxetine and its Metabolite Norfluoxetine Following Chronic Antidepressant Treatment**

| <b>Strain</b> | <b>Number of Animals (N)</b> | <b>Fluoxetine (ng/ml)</b> | <b>SEM</b> | <b>Norfluoxetine (ng/ml)</b> | <b>SEM</b> |
|---------------|------------------------------|---------------------------|------------|------------------------------|------------|
| 129S1/SvlmJ   | 13                           | 1152.9                    | 58.0       | 1079.8                       | 45.2       |
| A/J           | 15                           | 937.9                     | 47.7       | 1222.6                       | 48.0       |
| AKR/J         | 9                            | 988.1                     | 53.4       | 1119.2                       | 49.3       |
| BALB/cJ       | 12                           | 800.2                     | 40.5       | 930.8                        | 49.9       |
| BTBR T+ tf/J  | 12                           | 912.1                     | 51.4       | 1238.5                       | 79.2       |
| BUB/BnJ       | 9                            | 1396.9                    | 143.4      | 1391.7                       | 148.1      |
| C3H/HeJ       | 15                           | 763.1                     | 66.4       | 949.5                        | 65.1       |
| C57BL/6J      | 7                            | 1327.6                    | 220.9      | 1509.0                       | 186.3      |
| C57BLKS/J     | 12                           | 1243.5                    | 96.1       | 1195.0                       | 47.6       |
| C57BR/J       | 10                           | 988.9                     | 151.0      | 1260.4                       | 153.7      |
| C58/J         | 9                            | 987.2                     | 116.5      | 1335.6                       | 105.9      |
| CBA/J         | 11                           | 1103.9                    | 108.3      | 1093.3                       | 108.9      |
| CE/J          | 12                           | 1084.4                    | 73.2       | 1401.2                       | 74.0       |
| DBA/2J        | 16                           | 956.5                     | 95.7       | 1026.7                       | 56.4       |
| FVB/NJ        | 9                            | 595.2                     | 81.4       | 798.3                        | 120.0      |
| I/LnJ         | 8                            | 1606.5                    | 318.3      | 1438.3                       | 130.9      |
| LG/J          | 9                            | 1540.0                    | 117.0      | 1612.2                       | 134.9      |
| LP/J          | 19                           | 719.6                     | 67.3       | 783.4                        | 73.7       |
| MA/MyJ        | 9                            | 1905.6                    | 223.9      | 1314.3                       | 120.0      |
| MRL/MpJ       | 9                            | 1066.7                    | 183.5      | 1047.4                       | 143.1      |
| NOD/LtJ       | 12                           | 775.5                     | 81.9       | 912.0                        | 80.6       |
| NOR/LtJ       | 15                           | 483.3                     | 48.4       | 746.9                        | 65.2       |
| NZB/B1NJ      | 12                           | 1311.1                    | 142.6      | 1156.3                       | 81.2       |
| NZW/LacJ      | 9                            | 591.4                     | 66.6       | 762.9                        | 48.0       |
| P/J           | 11                           | 1885.5                    | 407.3      | 1267.5                       | 246.7      |
| PL/J          | 12                           | 757.4                     | 97.2       | 825.9                        | 111.9      |
| RHIS/J        | 12                           | 470.3                     | 36.5       | 578.6                        | 25.8       |
| SJL/J         | 11                           | 1274.8                    | 107.9      | 1124.5                       | 64.8       |
| SM/J          | 8                            | 1187.0                    | 320.2      | 1160.2                       | 256.4      |
| SWR/J         | 12                           | 749.3                     | 110.7      | 643.8                        | 108.6      |

SEM = standard error of the mean

**Online Resource 4.** Mean relative fluorescence intensity (RFI) values for thirty-one neurobiochemical analytes measured in the cortex of thirty mouse inbred strains

| Strains    | ACTH* | STD   | ACTH* | STD   | FUT9* | STD   | FUT9* | STD   | APOD* | STD   | APOD* | STD   | BAG1* | STD   | BAG1* | STD   | BDNF* | STD   | BDNF* | STD   | c-fos* | STD   | c-fos* | STD   | CREB* | STD   | CREB* | STD   | PPP1R1B* | STD   | PPP1R1B* | STD   | GAD67* | STD   | GAD67* | STD   | Galanin* | STD   | Galanin* | STD   | GFAP* | STD   | GFAP* | STD   | Ghrelin* | STD   | Ghrelin* | STD   | KCNJ9* | STD   | KCNJ9* | STD   | GSR* | STD   | GSR* | STD   | GLO1* | STD   | GLO1* | STD   | GNB1* | STD   | GNB1* | STD   | GSK3β* | STD   | GSK3β* | STD   | HDAC5* | STD   | HDAC5* | STD   | MCH* | STD   | MCH* | STD   | NGF* | STD   | NGF* | STD   | NPY* | STD   | NPY* | STD   | NMDA1* | STD   | NMDA1* | STD   | NET* | STD   | NET* | STD   | P2X7* | STD   | P2X7* | STD   | PTH* | STD   | PTH* | STD   | PAQR8* | STD   | PAQR8* | STD   | S100β* | STD   | S100β* | STD   | SGNE* | STD   | SGNE* | STD   | SERT* | STD   | SERT* | STD   | Somatostatin* | STD   | Somatostatin* | STD   | TNF-α* | STD   | TNF-α* | STD | VEGF* | STD | VEGF* | STD |
|------------|-------|-------|-------|-------|-------|-------|-------|-------|-------|-------|-------|-------|-------|-------|-------|-------|-------|-------|-------|-------|--------|-------|--------|-------|-------|-------|-------|-------|----------|-------|----------|-------|--------|-------|--------|-------|----------|-------|----------|-------|-------|-------|-------|-------|----------|-------|----------|-------|--------|-------|--------|-------|------|-------|------|-------|-------|-------|-------|-------|-------|-------|-------|-------|--------|-------|--------|-------|--------|-------|--------|-------|------|-------|------|-------|------|-------|------|-------|------|-------|------|-------|--------|-------|--------|-------|------|-------|------|-------|-------|-------|-------|-------|------|-------|------|-------|--------|-------|--------|-------|--------|-------|--------|-------|-------|-------|-------|-------|-------|-------|-------|-------|---------------|-------|---------------|-------|--------|-------|--------|-----|-------|-----|-------|-----|
| 129Sv/SvJm | 1.80  | 0.066 | 1.62  | 0.105 | 0.65  | 0.019 | 0.50  | 0.017 | 0.60  | 0.013 | 0.56  | 0.009 | 0.15  | 0.006 | 0.12  | 0.007 | 2.08  | 0.024 | 1.74  | 0.058 | 0.24   | 0.009 | 0.28   | 0.008 | 0.69  | 0.030 | 0.62  | 0.017 | 1.08     | 0.034 | 0.76     | 0.030 | 1.29   | 0.093 | 1.13   | 0.056 | 1.41     | 0.031 | 0.98     | 0.019 | 2.25  | 0.029 | 1.51  | 0.025 | 0.35     | 0.026 | 0.53     | 0.038 | 3.49   | 0.176 | 1.77   | 0.263 | 7.79 | 0.775 | 8.43 | 0.654 | 0.86  | 0.052 | 0.67  | 0.042 | 2.04  | 0.089 | 1.63  | 0.102 | 0.00   | 0.008 | 0.01   | 0.006 | 1.78   | 0.034 | 1.66   | 0.036 | 0.91 | 0.024 | 0.47 | 0.024 | 1.04 | 0.061 | 0.73 | 0.045 | 0.48 | 0.016 | 0.40 | 0.013 | 2.76   | 0.055 | 2.22   | 0.107 | 0.72 | 0.065 | 0.78 | 0.079 | 0.48  | 0.040 | 0.32  | 0.032 | 3.58 | 0.306 | 1.85 | 0.153 | 0.50   | 0.008 | 0.35   | 0.010 | 1.08   | 0.019 | 0.84   | 0.031 | 1.33  | 0.128 | 1.01  | 0.118 | 0.81  | 0.021 | 0.39  | 0.016 | 0.19          | 0.010 | 0.19          | 0.007 | 0.20   | 0.009 |        |     |       |     |       |     |

# Denotes RFI values for control mice (water); \* Denotes RFI values for fluoxetine-treated mice. STD stands for standard deviation. ACTH = Adrenocorticotropic releasing hormone; APOD = Apolipoprotein D; BAG1 = BCL2-associated atgane 1; BDNF = Brain-derived neurotrophic factor; CREB = CAMP response element-binding; PPP1R1B = Protein phosphatase 1 subunit 1B; DAT = Dopamine transporter; GAD67 = Glutamic acid decarboxylase-67; GAL = Galanin; GFAP = Glial fibrillary acidic protein; GLO1 = Glyoxalase 1; GNB1 = Guanine nucleotide-binding protein subunit beta 1; GSK3β = Glycogen synthase kinase 3 beta; GSR = Glutathione reductase; HDAC5 = Histone deacetylase 5; KCN9 = Potassium inwardly-rectifying channel, subfamily J, member 9; MCH = Melanin concentrating hormone; NET = Norepinephrine transporter; NGF = Nerve growth factor; NMDA1 = Glutamate receptor; NPY = Neuropeptide Y; P2X7 = Purinergic receptor ligand-gated ion channel 7; PAQR8 = Progesterin and adipoQ receptor 8; PTH = Parathyroid hormone; S100β = S100 beta protein; SERT = Serotonin transporter; SGNE = Secretogranin V; TNF-α = Tumor necrosis factor-alpha; VEGF = Vascular endothelial growth factor

**Online Resource 5.** Pairwise comparisons of behavioral scores between treatment groups.

| <b>Strain</b> | <b>U-Statistic for Percent Time Spent Immobile in the TST</b> | <b>Adjusted <i>p</i>-values***</b> | <b>U-Statistic for Percent Time Spent in the Center of the OF</b> | <b>Adjusted <i>p</i>-values***</b> |
|---------------|---------------------------------------------------------------|------------------------------------|-------------------------------------------------------------------|------------------------------------|
| 129S1/SvlmJ   | 96                                                            | 0.537                              | 111.5                                                             | 0.294                              |
| A/J           | 114                                                           | 0.264                              | 115.0                                                             | 0.917                              |
| AKR/J         | 41                                                            | 0.345                              | 40.0                                                              | 0.965                              |
| BALB/cJ       | 249.5                                                         | 0.001**                            | 47.5                                                              | 0.879                              |
| BTBR T+ tf/J  | 45                                                            | 0.386                              | 61.0                                                              | 0.619                              |
| BUB/BnJ       | 62                                                            | 0.012*                             | 51.5                                                              | 0.136                              |
| C3H/HeJ       | 121                                                           | 0.291                              | 117.5                                                             | 0.836                              |
| C57BL/6J      | 57                                                            | 0.007**                            | 63.5                                                              | 0.500                              |
| C57BLKS/J     | 71                                                            | 0.260                              | 63.0                                                              | 0.843                              |
| C57BR/cdJ     | 95                                                            | 0.023*                             | 124.0                                                             | 0.097                              |
| C58/J         | 42                                                            | 0.895                              | 53.0                                                              | 0.270                              |
| CBA/J         | 190.5                                                         | 0.00002**                          | 117.0                                                             | 0.369                              |
| CE/J          | 69                                                            | 0.286                              | 70.0                                                              | 0.256                              |
| DBA/2J        | 131.5                                                         | 0.094^                             | 262.5                                                             | 0.014*                             |
| FVB/NJ        | 43                                                            | 0.248                              | 64.0                                                              | 0.038                              |
| I/LnJ         | 24                                                            | 0.427                              | 66.5                                                              | 0.063                              |
| LG/J          | 61                                                            | 0.070^                             | 77.0                                                              | 0.037                              |
| LP/J          | 41.5                                                          | 0.826                              | 115.0                                                             | 0.147                              |
| MA/MyJ        | 63                                                            | 0.047*                             | 68.0                                                              | 0.015*                             |
| MRL/MpJ       | 37                                                            | 0.923                              | 57.5                                                              | 0.265                              |
| NOD/LtJ       | 81                                                            | 0.067^                             | 61.0                                                              | 0.974                              |
| NOR/LtJ       | 48                                                            | 0.205                              | 55.5                                                              | 0.973                              |
| NZB/BINJ      | 46                                                            | 0.594                              | 95.5                                                              | 0.022                              |
| NZW/LacJ      | 50                                                            | 0.178                              | 39.0                                                              | 0.895                              |
| P/J           | 90                                                            | 0.001**                            | 79.0                                                              | 0.025                              |
| PL/J          | 94                                                            | 0.025*                             | 102.5                                                             | 0.078                              |
| RIIS/J        | 66                                                            | 0.394                              | 73.0                                                              | 0.177                              |
| SJL/J         | 50                                                            | 0.970                              | 100.5                                                             | 0.009**                            |
| SM/J          | 49                                                            | 0.002**                            | 64.0                                                              | 0.007**                            |
| SWR/J         | 93                                                            | 0.225                              | 83.0                                                              | 0.525                              |

\*\*\* Following Mann-Whitney U test for post-hoc pairwise comparisons of behavioral scores between treatment groups, *p*-values were adjusted for multiple comparisons using the Benjamini-Hochberg correction for multiple testing; \*\* denotes *p*-values  $p < 0.01$ ; \* denotes *p*-values  $p < 0.05$ ; ^denotes *p*-values  $p < 0.10$

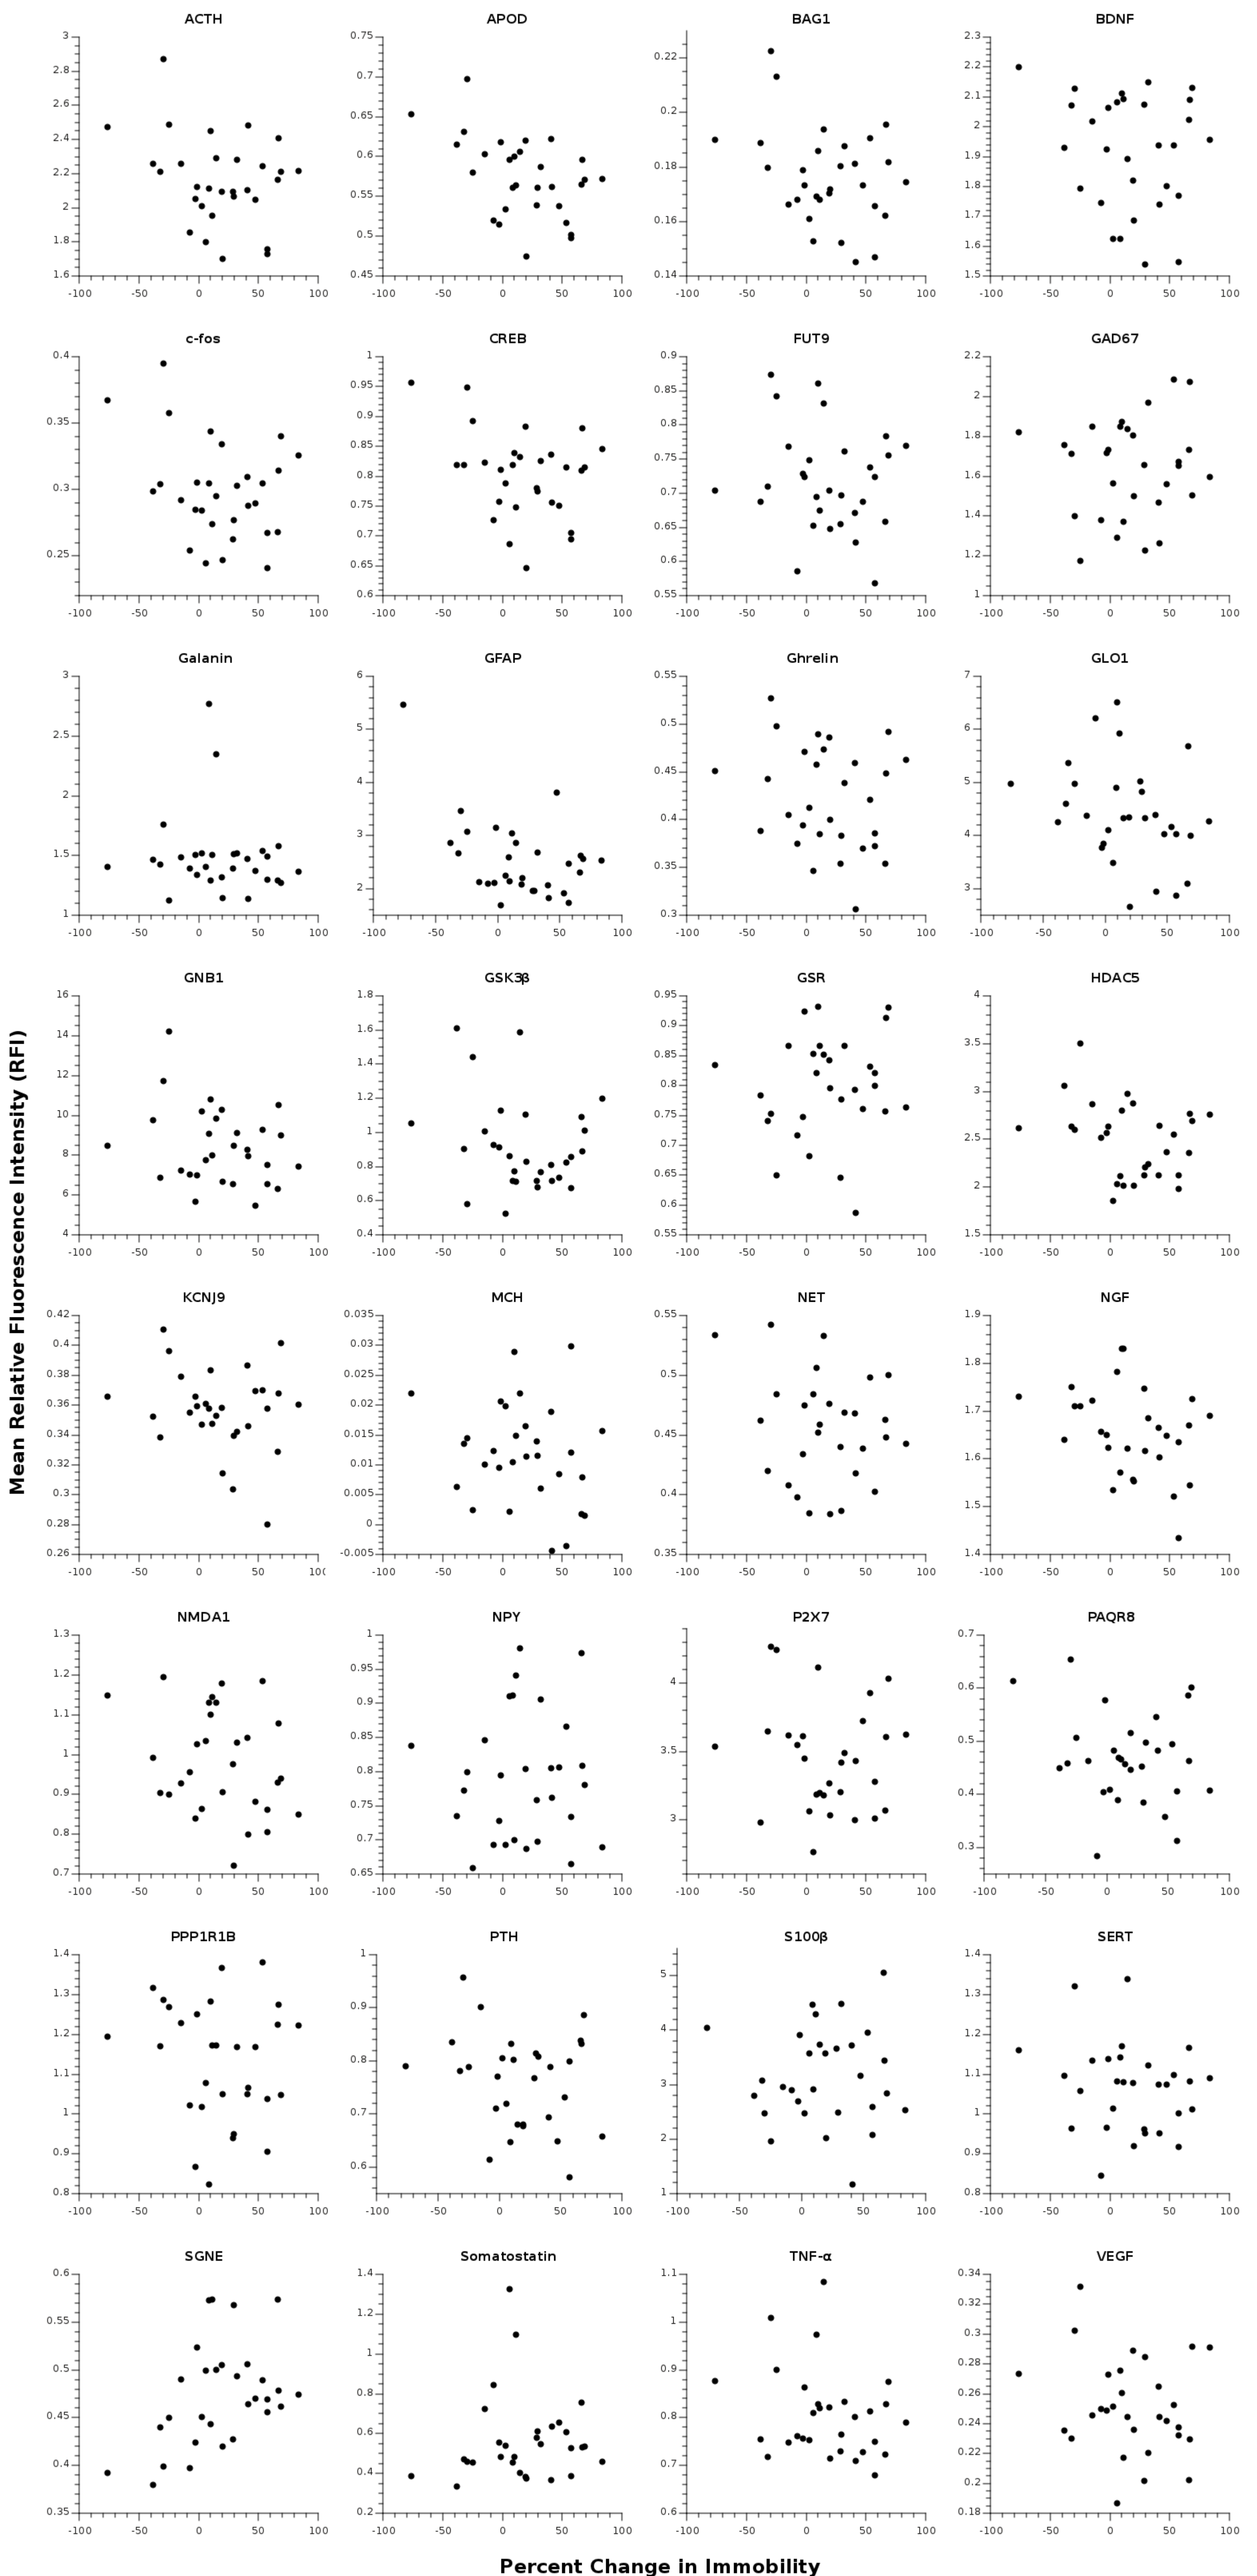

Online Resource 6a. Scatter plots of depressive-like and neurobiochemical measures in the control group



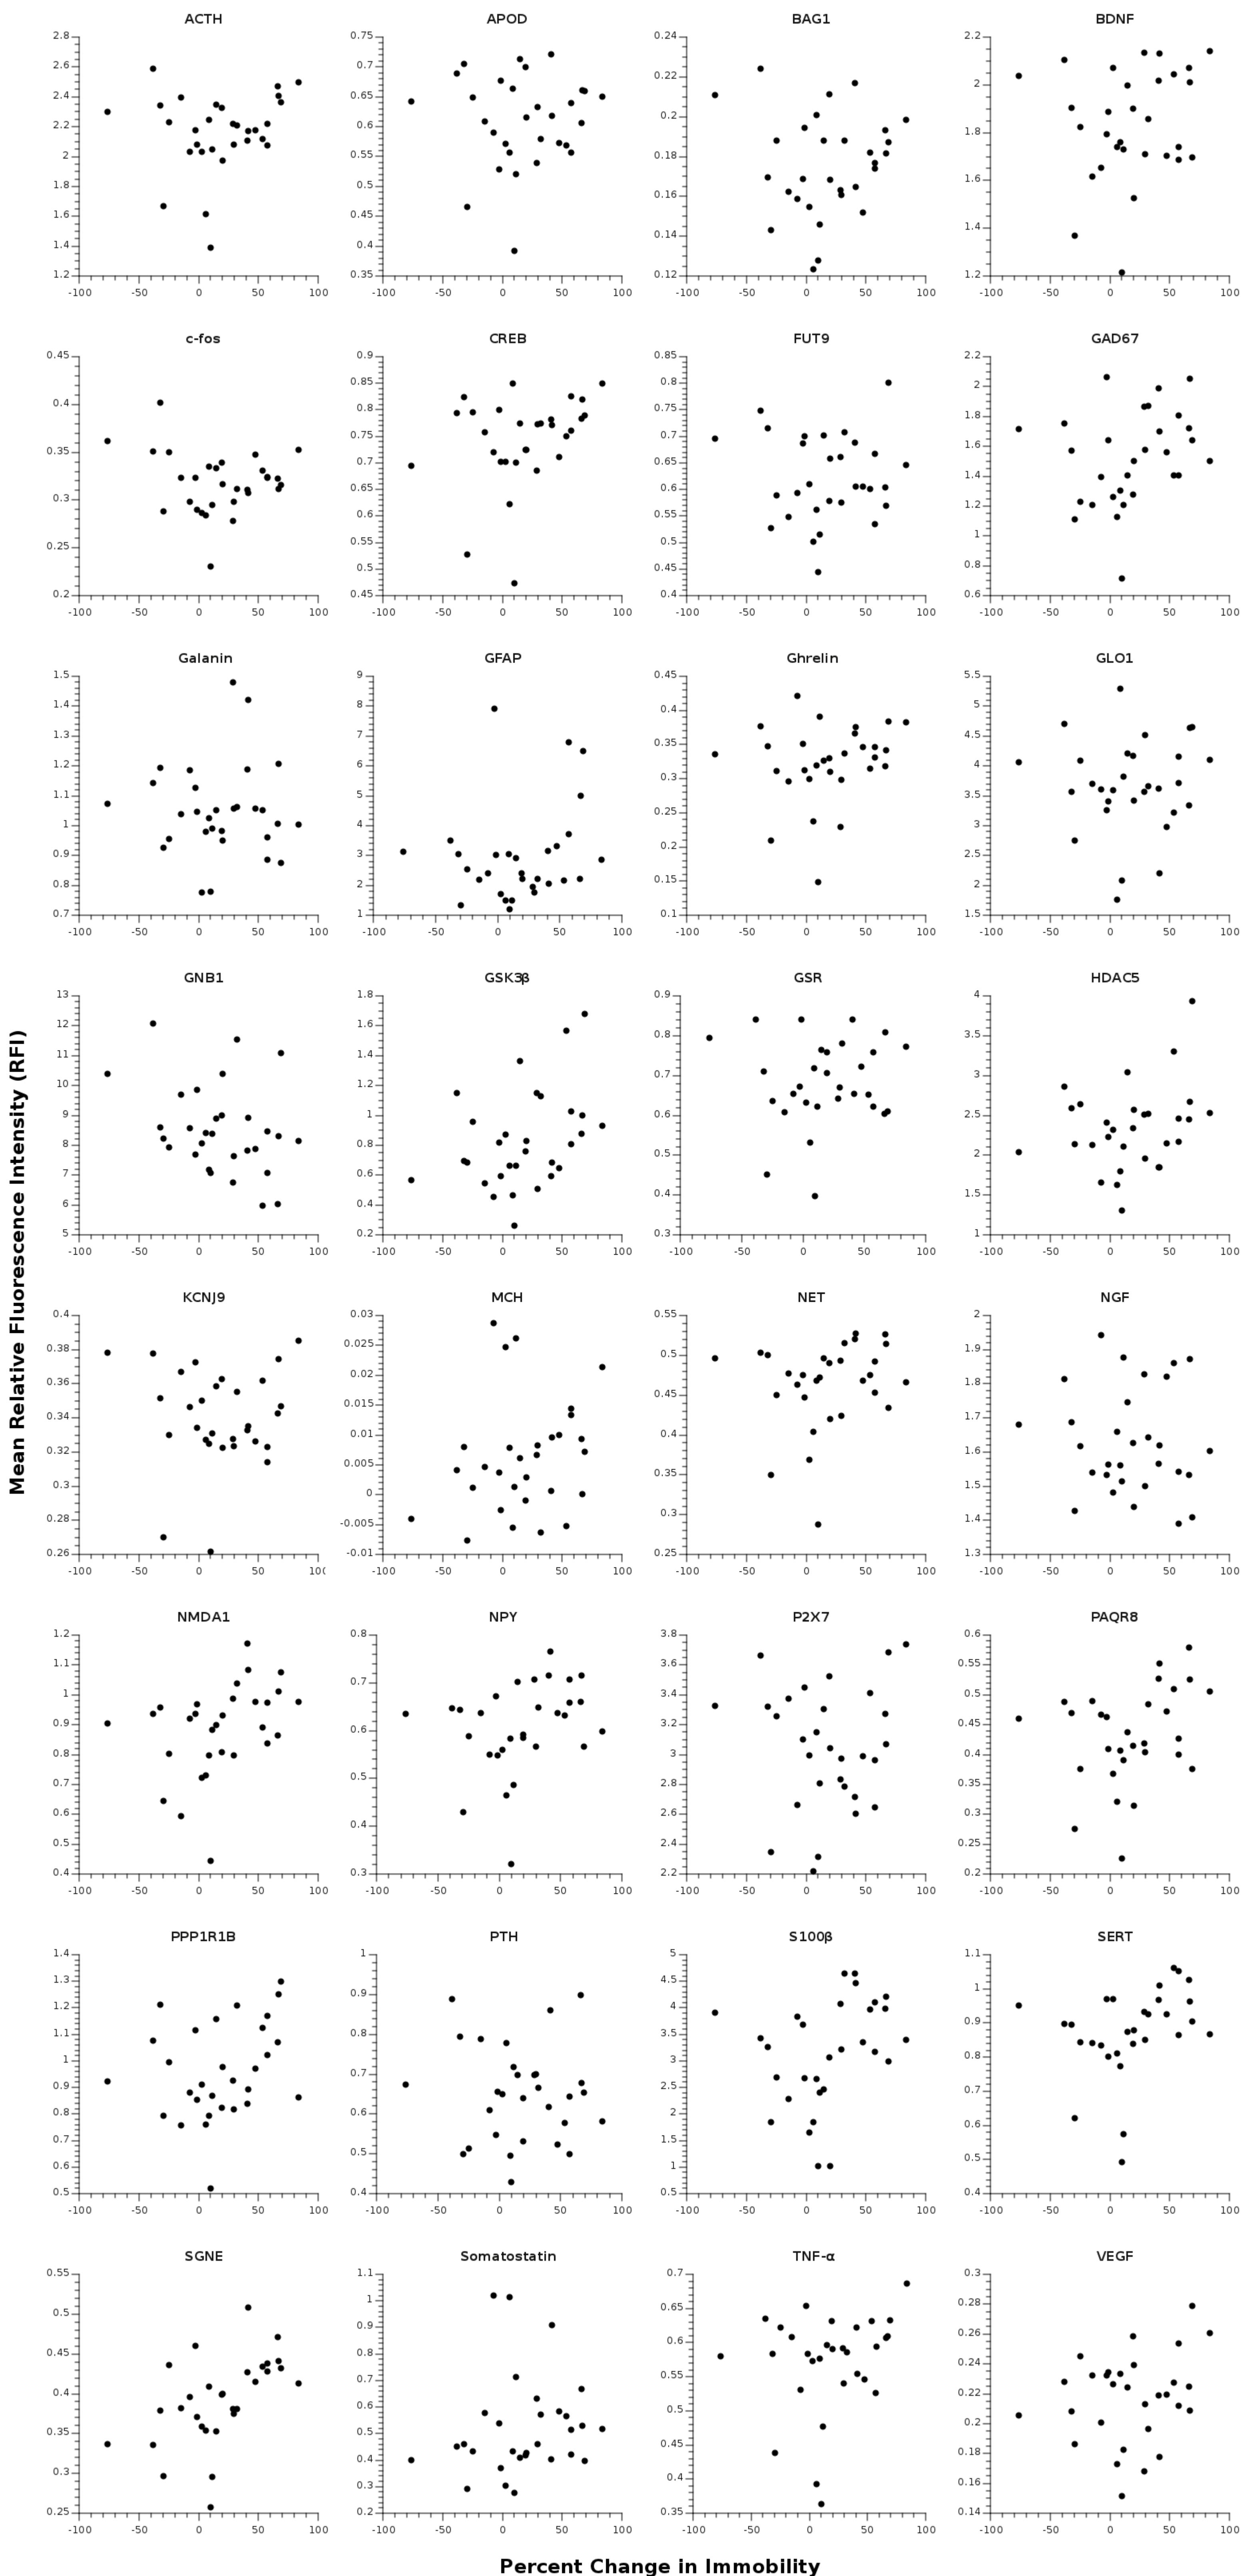

**Online Resource 6b.** Scatter plots of depressive-like and neurobiochemical measures in the fluoxetine group

**Online Resource 7.** Covariance of behavior and neurobiochemical levels explained by partial least squares (PLS) latent vectors

|                          | Percent covariance explained for behavior and biochemical levels | Cumulative percent covariance explained for behavior and biochemical levels |
|--------------------------|------------------------------------------------------------------|-----------------------------------------------------------------------------|
| <b><i>Vehicle</i></b>    |                                                                  |                                                                             |
| Vector 1                 | 59                                                               | 59                                                                          |
| Vector 2                 | 29                                                               | 88                                                                          |
| Vector 3                 | 12                                                               | 100                                                                         |
| <b><i>Fluoxetine</i></b> |                                                                  |                                                                             |
| Vector 1                 | 56                                                               | 56                                                                          |
| Vector 2                 | 33                                                               | 89                                                                          |
| Vector 3                 | 11                                                               | 100                                                                         |



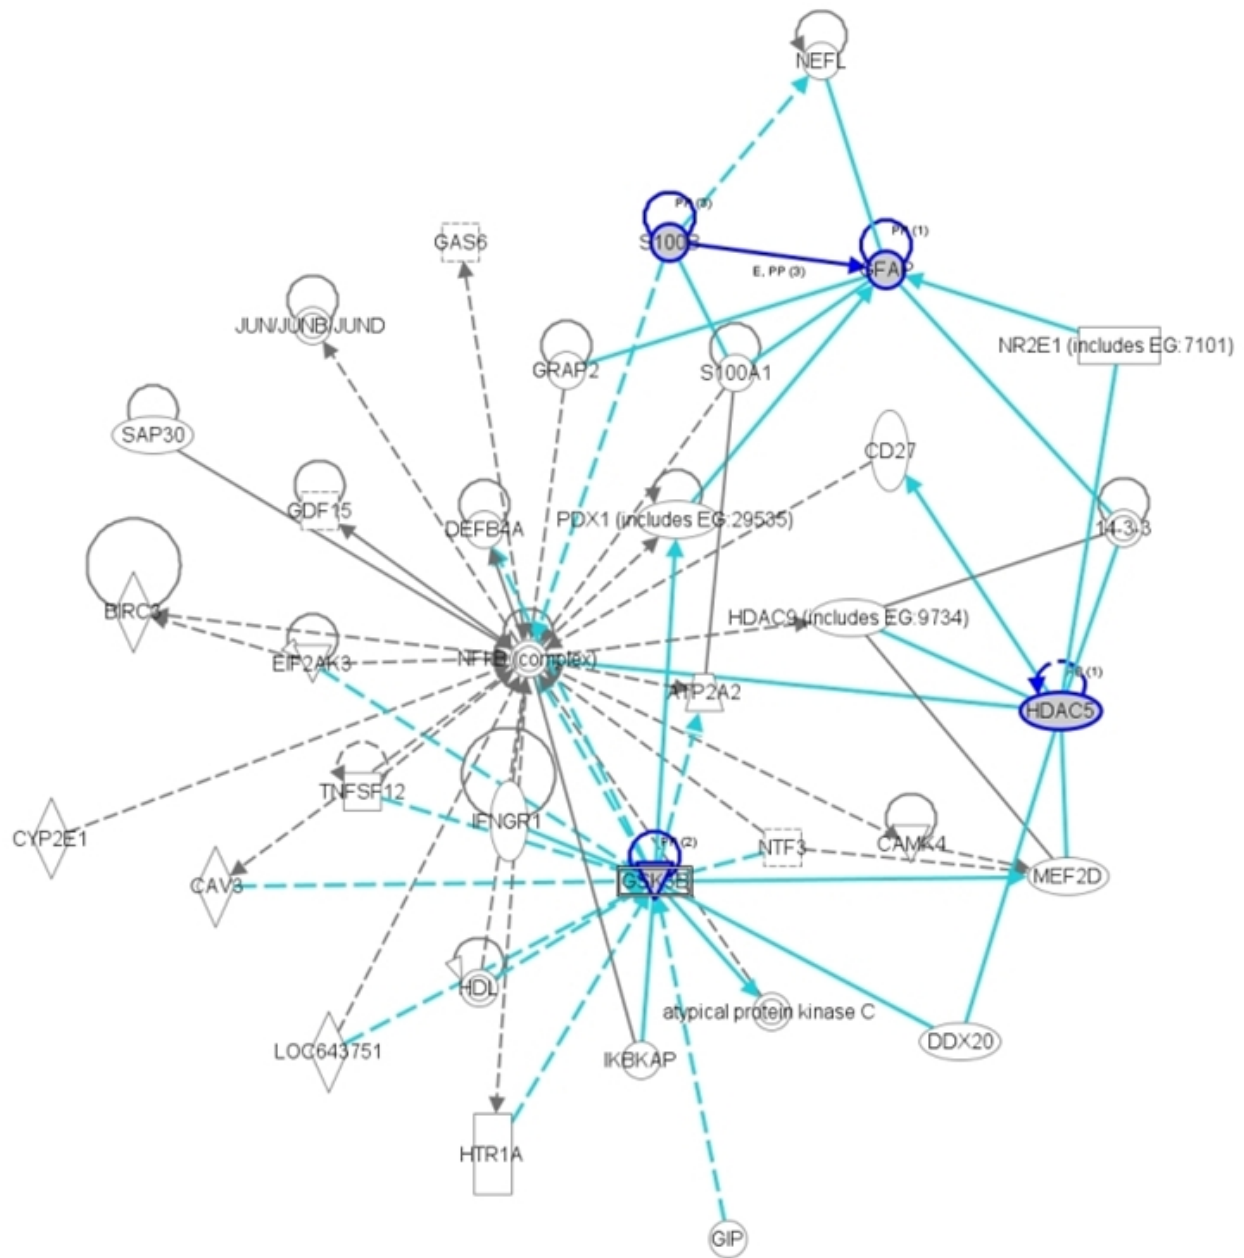

**Online Resource 8.** Cellular adhesion and proliferation pathway links candidate antidepressant biochemical markers S100 $\beta$ , GFAP, GSK3 $\beta$ , and HDAC5

**Online Resource 9a.** Informative genes used to predict treatment groups in the kNN leave-one-out cross-validation test

| <b>Genes</b>  | <b>Description</b>                                                                                                                                  |
|---------------|-----------------------------------------------------------------------------------------------------------------------------------------------------|
| Gm129         | gene model 129                                                                                                                                      |
| Lgi2          | leucine-rich repeat LGI family, member 2                                                                                                            |
| Erf           | Ets2 repressor factor                                                                                                                               |
| Gnb4          | guanine nucleotide binding protein (G protein), beta 4                                                                                              |
| Cdc42ep3      | CDC42 effector protein (Rho GTPase binding) 3                                                                                                       |
| Anp32a        | acidic (leucine-rich) nuclear phosphoprotein 32 family, member A                                                                                    |
| 2400009B08Rik | RIKEN cDNA 2400009B08 gene,<br>sema domain, immunoglobulin domain (Ig), transmembrane domain (TM) and short cytoplasmic domain,<br>(semaphorin) 4A, |
| Sema4a        |                                                                                                                                                     |
| Gpc1          | glypican 1                                                                                                                                          |
| Inhba         | inhibin beta-A                                                                                                                                      |
| C030003D03Rik | RIKEN cDNA C030003D03 gene                                                                                                                          |
| Sgsm1         | small G protein signaling modulator 1                                                                                                               |

**Online Resource 9b.** Informative genes used to predict response groups in the kNN leave-one-out cross-validation test

| <b>Genes</b> | <b>Description</b>                                     |
|--------------|--------------------------------------------------------|
| Copg2as2     | coatamer protein complex, subunit gamma 2, antisense 2 |
| Prcp         | prolylcarboxypeptidase (angiotensinase C)              |
| Gpr115       | G protein-coupled receptor 115                         |
| Gxylt2       | glycosyltransferase 8 domain containing 4              |
| Plb1         | phospholipase B1                                       |
| Txndc9       | thioredoxin domain containing 9                        |
| Mum11l       | melanoma associated antigen (mutated) 1-like 1         |
| EG545391     | predicted gene                                         |

**Online Resource 10.** List of candidate baseline genetic markers that account for variable antidepressant response

| Gene          | Gene Name                                          | $p$ -value | R <sup>2</sup> | Adjusted R <sup>2</sup> |
|---------------|----------------------------------------------------|------------|----------------|-------------------------|
| 9230108115Rik | RIKEN cDNA 9230108115 gene                         | 0.00014    | 0.61           | 0.58                    |
| Gm16432       | Predicted gene 16432                               | 0.00057    | 0.53           | 0.51                    |
| C78760        | Expressed sequence C78760                          | 0.00069    | 0.52           | 0.49                    |
| Smurf2        | SMAD specific E3 ubiquitin protein ligase 2        | 0.00086    | 0.51           | 0.48                    |
| 2610005L07Rik | Cadherin 11 pseudogene                             | 0.00113    | 0.49           | 0.46                    |
| Lmo3          | LIM domain only 3                                  | 0.00156    | 0.47           | 0.44                    |
| Tcrb-J        | T-cell receptor beta, joining region               | 0.00206    | 0.46           | 0.42                    |
| LOC665506     | T-cell receptor beta, joining region               | 0.00278    | 0.44           | 0.40                    |
| Pabpc1        | Poly(A) binding protein, cytoplasmic 1             | 0.00431    | 0.41           | 0.37                    |
| Ern1          | Endoplasmic reticulum (ER) to nucleus signalling 1 | 0.00461    | 0.40           | 0.37                    |
| LOC627901     | Similar to zinc finger protein 14                  | 0.00533    | 0.39           | 0.36                    |
